# Supplementary material
Source: MDPI journal article supplement (https://www.mdpi.com/2073-4395/13/1/115)
Supplement: s1 [file s1]

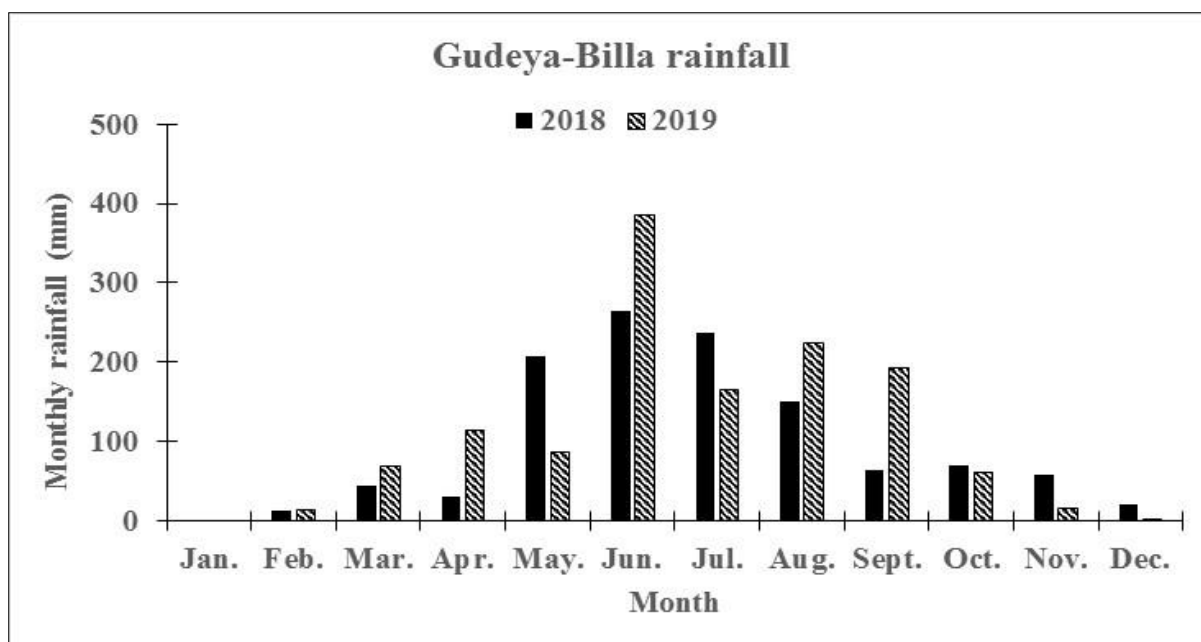

Figure S1. Monthly rainfall received at Gudeya-Billa trial sites during experimentation in 2018 and 2019 seasons.

Table S1. ANOVA output for grain yield obtained from maize cropping systems tested in western Ethiopia.

|              | Grain Yield |                    | Gross Margins |                    | Stover    |                    | Maize Energy |                    | Maize Protein |                    |
|--------------|-------------|--------------------|---------------|--------------------|-----------|--------------------|--------------|--------------------|---------------|--------------------|
|              | Estimate    | Pr(> t )           | Estimate      | Pr(> t )           | Estimate  | Pr(> t )           | Estimate     | Pr(> t )           | Estimate      | Pr(> t )           |
| (Intercept)  | 7388.00     | 0.00***            | 986.97        | 0.00***            | 17573.00  | 0.00***            | 109.19       | 0.00***            | 738.79        | 0.00***            |
| No-till      | 1210.00     | 0.28 <sup>ns</sup> | 357.64        | 0.17 <sup>ns</sup> | 2804.00   | 0.33 <sup>ns</sup> | 17.88        | 0.30 <sup>ns</sup> | 121.00        | 0.30 <sup>ns</sup> |
| season:2019  | -4092.10    | 0.00***            | -863.16       | 0.00***            | -10524.00 | 0.00***            | -60.48       | 0.00***            | -409.20       | 0.00***            |
| season:2020  | -3071.20    | 0.02**             | -340.93       | 0.24 <sup>ns</sup> | -12464.00 | 0.00***            | -45.39       | 0.02***            | -307.11       | 0.02***            |
| No-till:2019 | 140.70      | 0.93 <sup>ns</sup> | 27.91         | 0.94 <sup>ns</sup> | -1643.00  | 0.70 <sup>ns</sup> | 2.08         | 0.93 <sup>ns</sup> | 14.06         | 0.93 <sup>ns</sup> |
| No-till:2020 | 349.20      | 0.85 <sup>ns</sup> | -201.22       | 0.62 <sup>ns</sup> | -2379.00  | 0.61 <sup>ns</sup> | 10.87        | 0.69 <sup>ns</sup> | 73.54         | 0.69 <sup>ns</sup> |

Ref: CP, season 2018, No-till:2018, ns=not significant and \*\*\* significant

Table S2. ANOVA output for analyses of grain and straw yield, gross margins, energy, and proteins from wheat cropping systems.

|                     | Grain Yield |                    | Gross Margin |                    | Stover   |                    | Energy   |                    | Protein  |                    |
|---------------------|-------------|--------------------|--------------|--------------------|----------|--------------------|----------|--------------------|----------|--------------------|
|                     | Estimate    | Pr(> t )           | Estimate     | Pr(> t )           | Estimate | Pr(> t )           | Estimate | Pr(> t )           | Estimate | Pr(> t )           |
| (Intercept)         | 2743.30     | 0.00***            | 862.20       | 0.02***            | 3923.75  | 0.00***            | 37.78    | 0.00***            | 340.11   | 0.00***            |
| No-till             | 182.20      | 0.87 <sup>ns</sup> | 175.30       | 0.74 <sup>ns</sup> | 845.00   | 0.60 <sup>ns</sup> | 2.51     | 0.87 <sup>ns</sup> | 22.62    | 0.87 <sup>ns</sup> |
| season-2019         | -733.70     | 0.29 <sup>ns</sup> | -177.08      | 0.60 <sup>ns</sup> | 3390.69  | 0.00***            | -10.11   | 0.29 <sup>ns</sup> | -90.98   | 0.29 <sup>ns</sup> |
| season-2020         | 938.60      | 0.29 <sup>ns</sup> | 883.40       | 0.04**             | -43.56   | 0.97 <sup>ns</sup> | 12.93    | 0.29 <sup>ns</sup> | 116.37   | 0.29 <sup>ns</sup> |
| Sub-humid           | 852.00      | 0.37 <sup>ns</sup> | 6.67         | 0.99 <sup>ns</sup> | 1069.04  | 0.46 <sup>ns</sup> | 11.74    | 0.37 <sup>ns</sup> | 105.71   | 0.37 <sup>ns</sup> |
| No-till:season-2019 | 291.70      | 0.77 <sup>ns</sup> | 193.43       | 0.68 <sup>ns</sup> | -323.82  | 0.83 <sup>ns</sup> | 4.02     | 0.77 <sup>ns</sup> | 36.18    | 0.77 <sup>ns</sup> |
| No-till:season-2020 | 675.70      | 0.59 <sup>ns</sup> | 431.97       | 0.48 <sup>ns</sup> | 7.90     | 1.00 <sup>ns</sup> | 9.31     | 0.59 <sup>ns</sup> | 83.80    | 0.59 <sup>ns</sup> |
| No-till:Sub-humid   | 248.90      | 0.85 <sup>ns</sup> | 84.88        | 0.90 <sup>ns</sup> | 95.29    | 0.96 <sup>ns</sup> | 3.42     | 0.85 <sup>ns</sup> | 30.83    | 0.85 <sup>ns</sup> |

Ref: CP, season 2018, CP-2018, Semi-arid, CP: Sub-humid
